# Supplementary material for: Pneumonite du paillage chez un patient atteint de granulomatose chronique
Source: PubMed Central journal article supplement — CMAJ. 2023 Feb 13;195(6):E249–50. [Article in French] doi: 10.1503/cmaj.220713-f (PMC9928436; doi:10.1503/cmaj.220713-f), 2023-02-13
Supplement: 220713-image-1-at.pdf [file 220713-image-1-at.pdf]

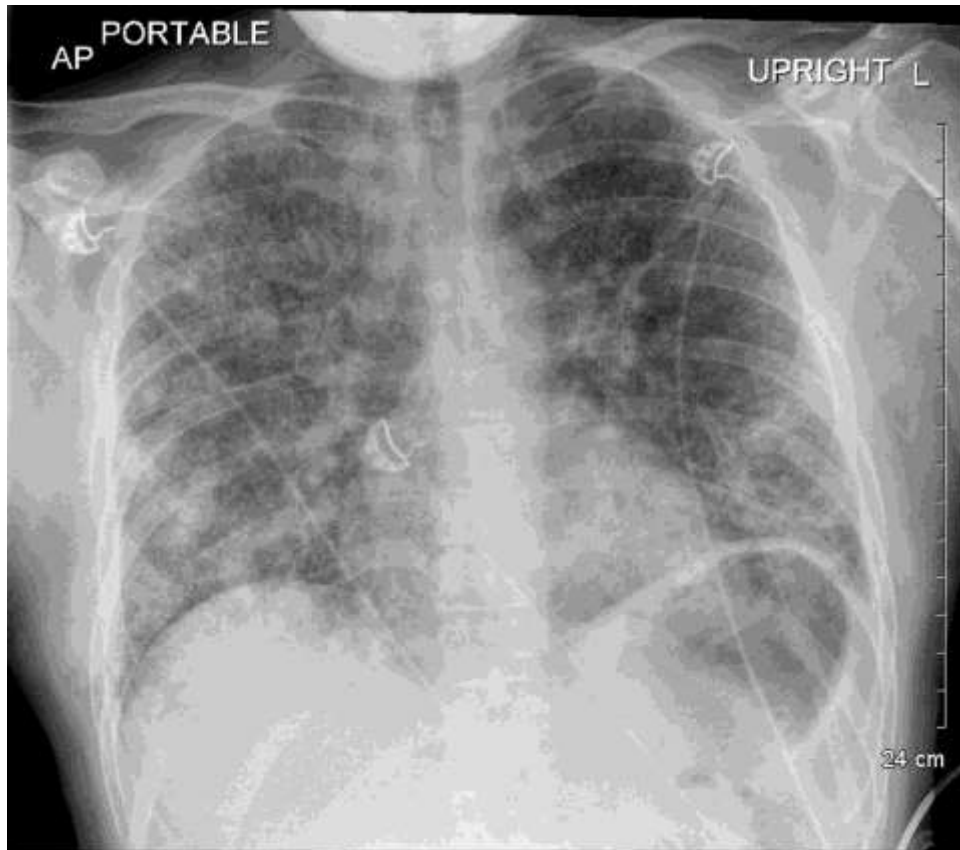

The chest x-ray on day 8 showed more interval deterioration than day 2, with new coarse interstitial lung markings and ground-glass opacities in the mid to lower lung zones.
